# Supplementary material for: Secondary bone marrow graft loss after third-party virus-specific T cell infusion: Case report of a rare complication
Source: PubMed Central journal article supplement (PMC10980733; doi:10.1038/s41467-024-47056-3), 2024-03-29
Supplement: 41467_2024_47056_MOESM1_ESM.pdf [file 41467_2024_47056_MOESM1_ESM.pdf]

Supplemental Material for:

Secondary bone marrow graft loss after third-party virus-specific T cell infusion: Case report of a rare complication

Michael D. Keller,<sup>1,2,3</sup> Stefan A. Schattgen,<sup>4</sup> Shanmuganathan Chandrakasan,<sup>5</sup> E. Kaitlynn Allen,<sup>4</sup> Mariah A. Jensen-Wachspress,<sup>1</sup> Christopher A. Lazarski,<sup>1</sup> Muna Qayed,<sup>5</sup> Haili Lang,<sup>1</sup> Patrick J. Hanley,<sup>1,3,6</sup> Jay Tanna,<sup>1,6</sup> Sung-Yun Pai,<sup>7</sup> Suhag Parikh,<sup>5</sup> Seth I. Berger,<sup>8</sup> Stephen Gottschalk,<sup>4</sup> Michael A. Pulsipher,<sup>9</sup> Paul G. Thomas,<sup>4</sup> Catherine M. Bollard\*<sup>1,3,6</sup>

\*Corresponding author: Catherine M. Bollard, MD  
Email: [cbollard@childrensnational.org](mailto:cbollard@childrensnational.org)

Total Cells

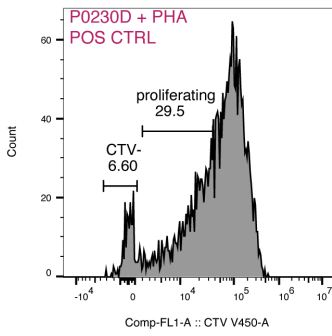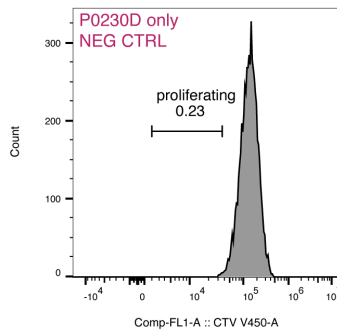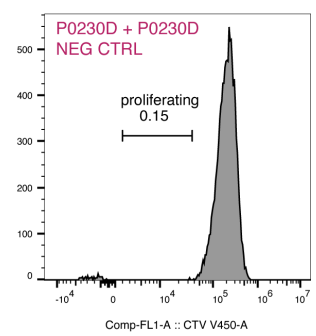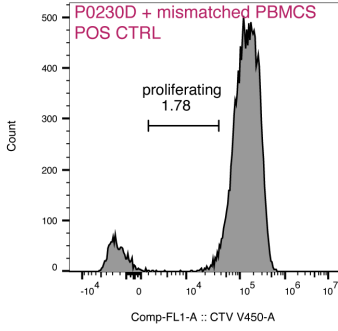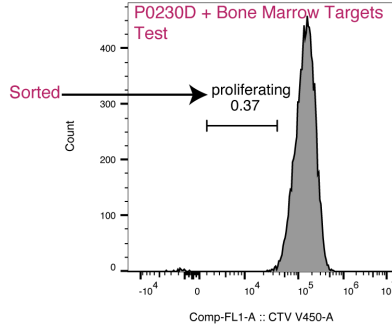

Cell Trace Violet (Effector Labeling)

Supplemental Figure 1: Mixed lymphocyte culture of the infused VST product (P0230D) against irradiated target cells. Proliferation of VSTs by cell trace violet following 5 day co-culture with irradiated targets (HLA mismatched PHA blasts, autologous cells, or bone marrow product cells from the first BMT donor [paternal]). CTV = cell trace violet.

**A.**

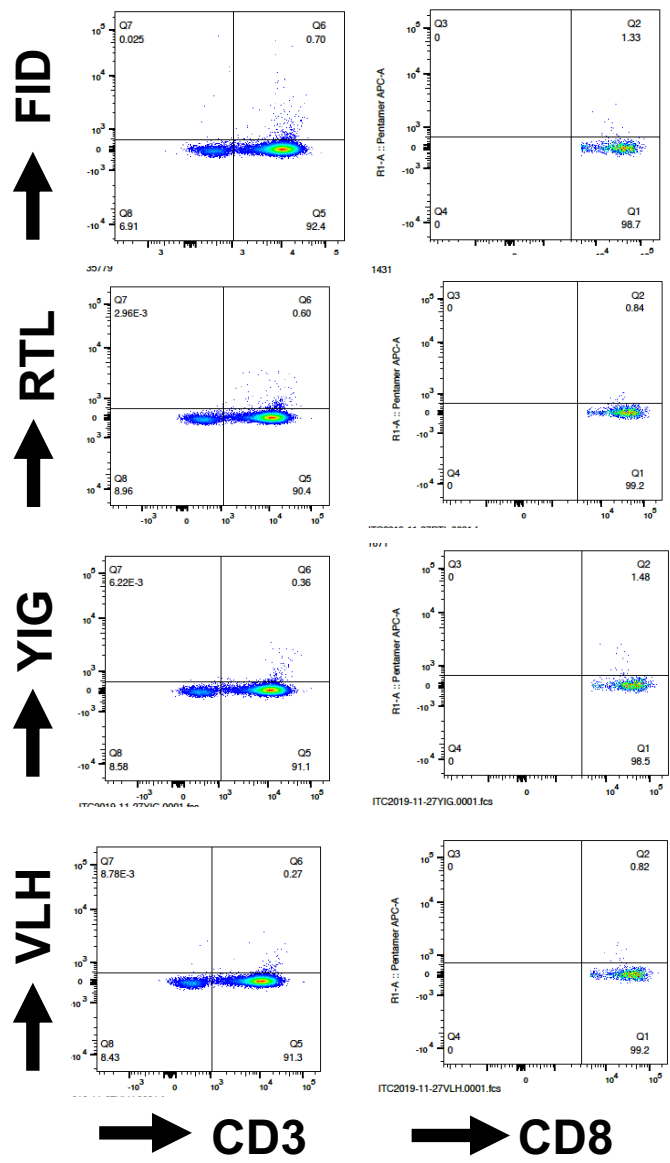

**B.**

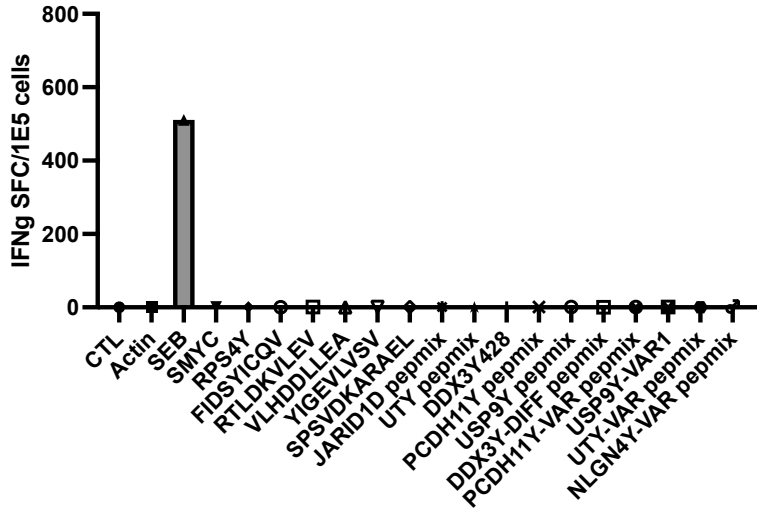

Supplemental Figure 2: Candidate alloantigen testing in the infused VST product (n=1). A. Pentamer staining for multiple previously described H-Y alloantigens in the VST product (FID: FIDSYICQV; RTL: RTLDKVLEV, VLH: VLHDDLLEA, YIG: YIGEVLVSV) B. Candidate alloantigen reactivity testing of the infused VST product by interferon-gamma ELISpot. SEB = staphylococcal enterotoxin B; SFC = spot forming colonies.

# P0230D/CD4 T-cells, day 10 post-expansion

## +Actin

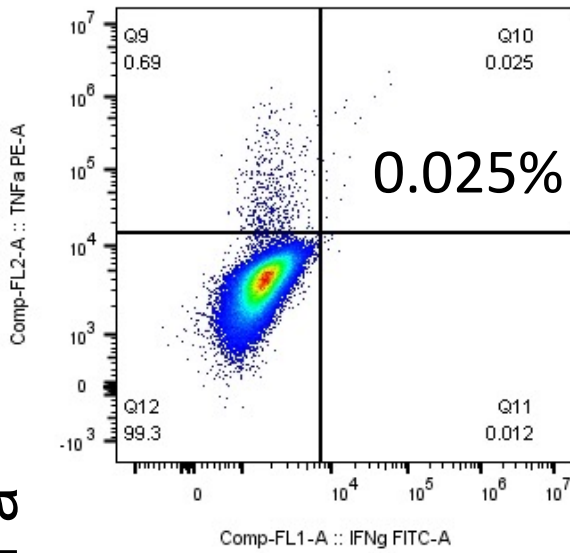

## +RPS4Y

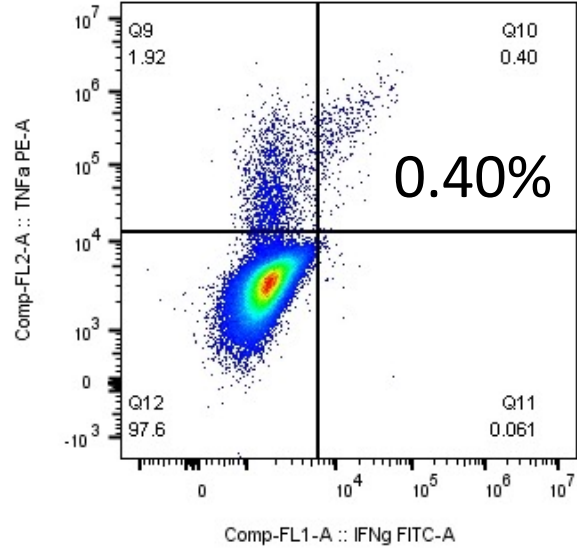

## +SMYC

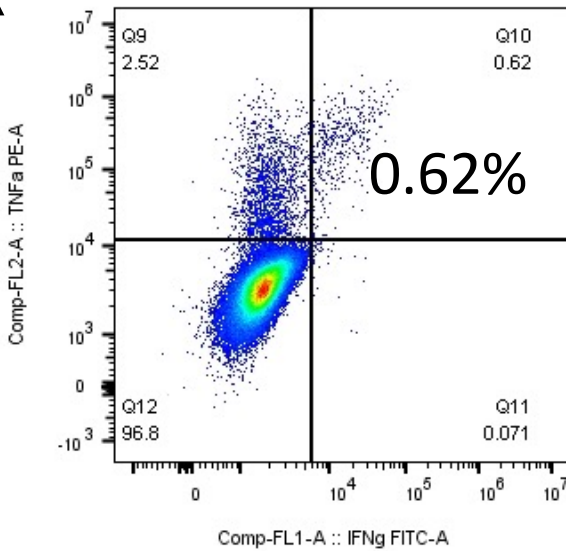

## +NeoAg's

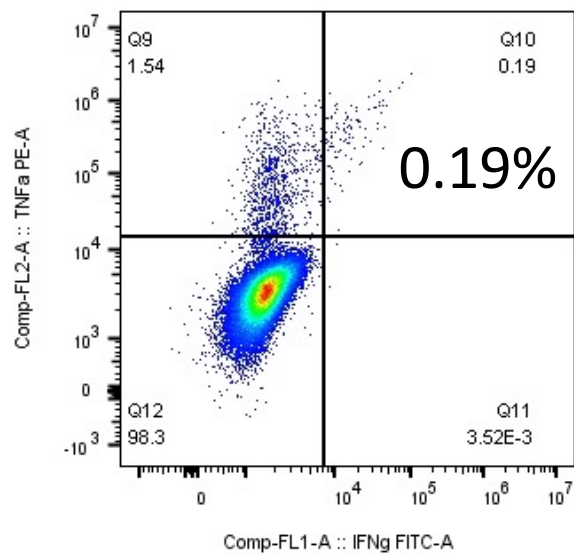

TNF $\alpha$

IFN- $\gamma$

Supplemental Figure 3: T cell specificity testing for candidate alloantigens and neoantigens recognized by T cells from VST donor P0230D by intracellular flow cytometry at day 10 post-expansion. Neoantigen (NeoAg) peptide library was derived from the genome sequence of P0230D, as listed in Supplemental Table 7.

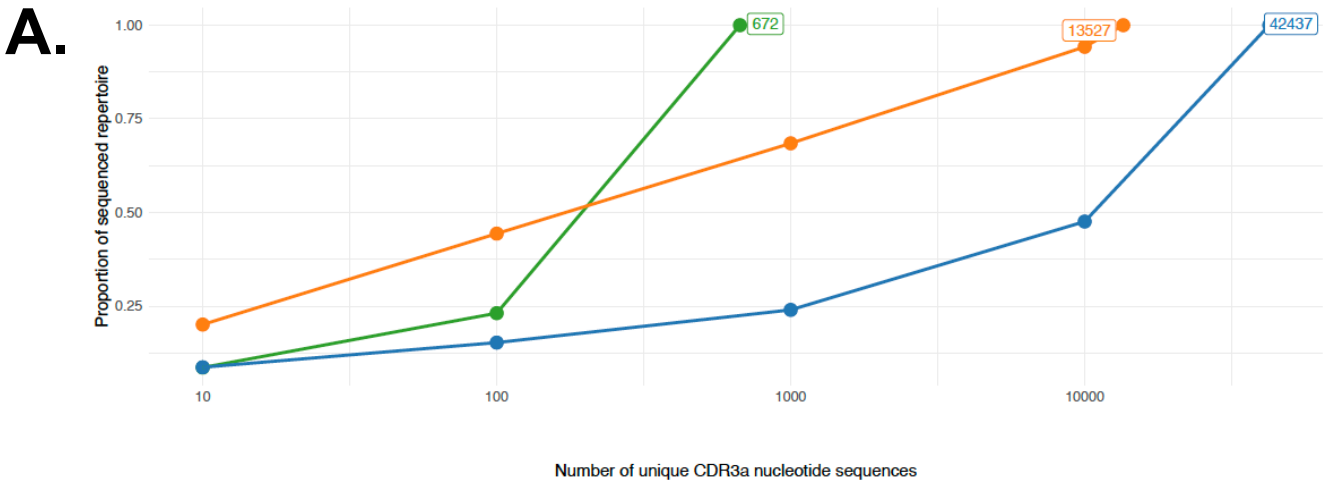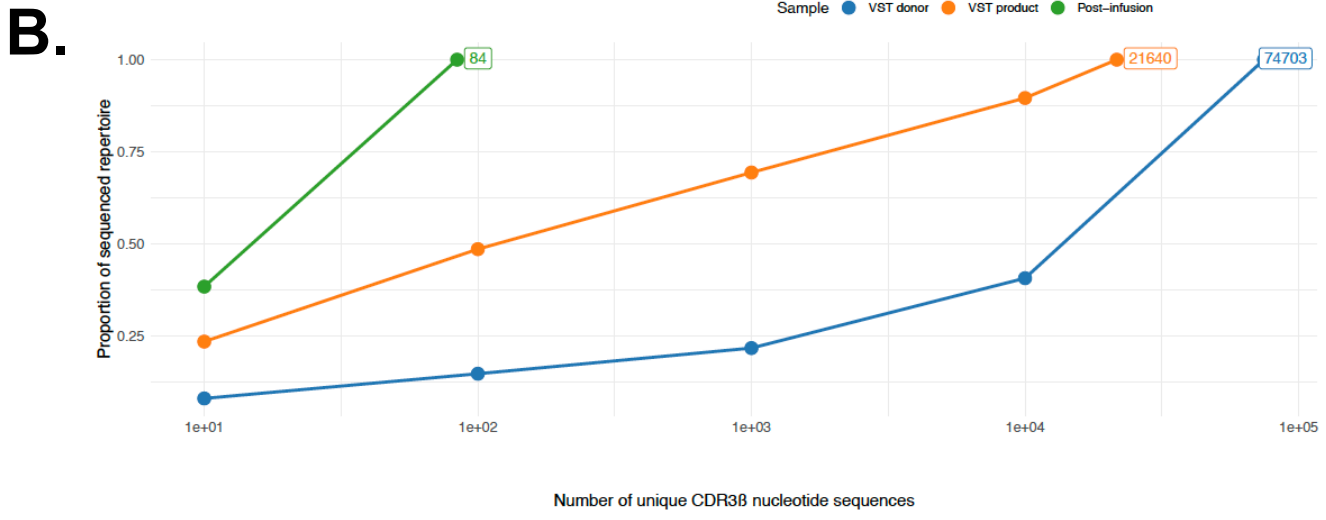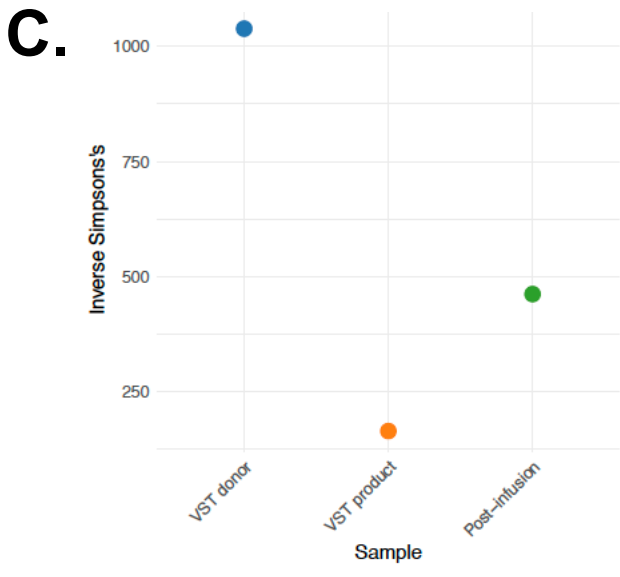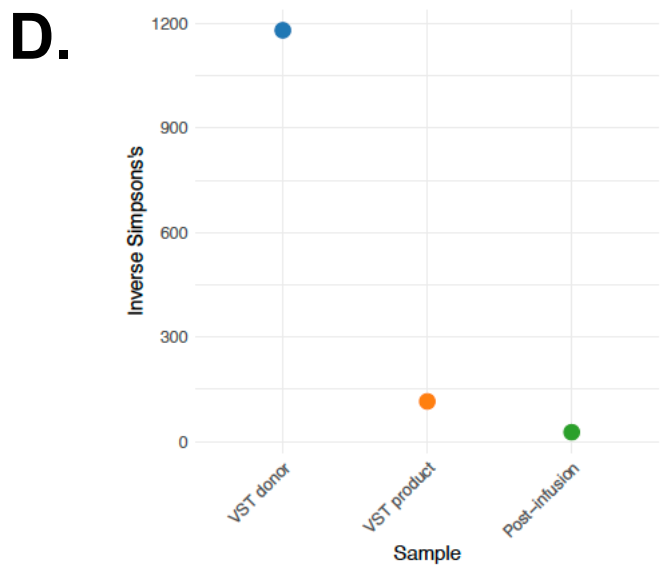

Supplemental Figure 4: Clonotype proportions and diversity of the VST product, VST donor peripheral blood mononuclear cells, and recipient peripheral blood mononuclear cells at day +30. A-B: Proportion of total repertoire versus unique TCRa(A) and TCRb(B) clonotypes. C-D: Inverse Simpson's diversity indices for TCRa (C) and TCRb (D) sequences.

**A.**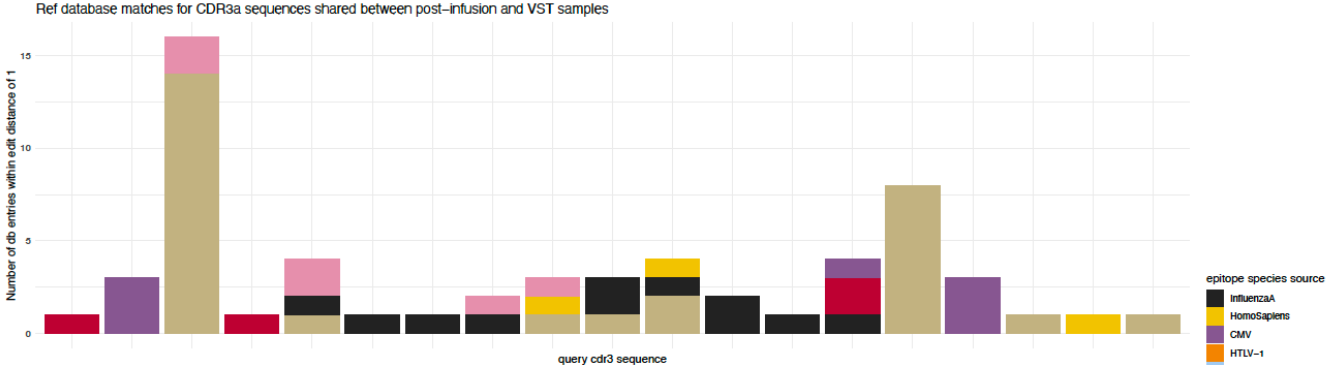**B.**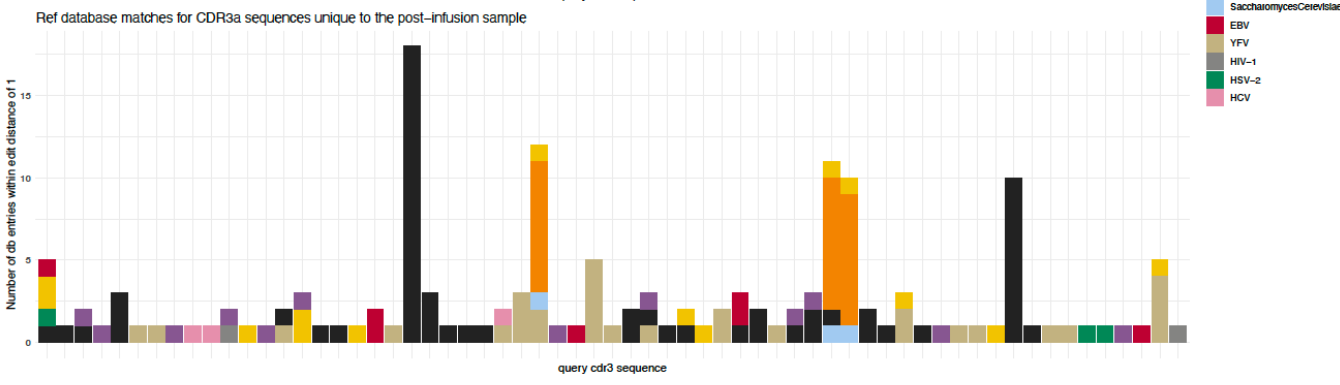

Supplemental Figure 5: Evaluation of public clonotypes in the VST donor and recipient. A. Public clonotype matches for clonotypes shared between the VST donor and recipient (day +30). B. Public clonotype matches with the recipient only at day +30.

**A.**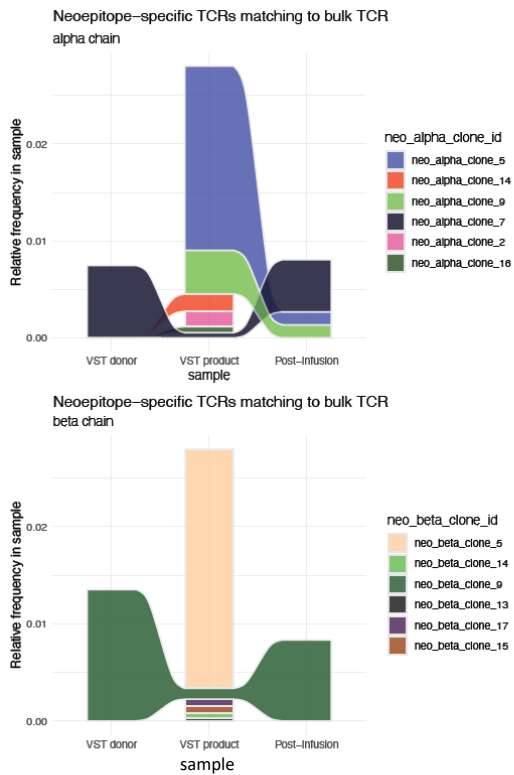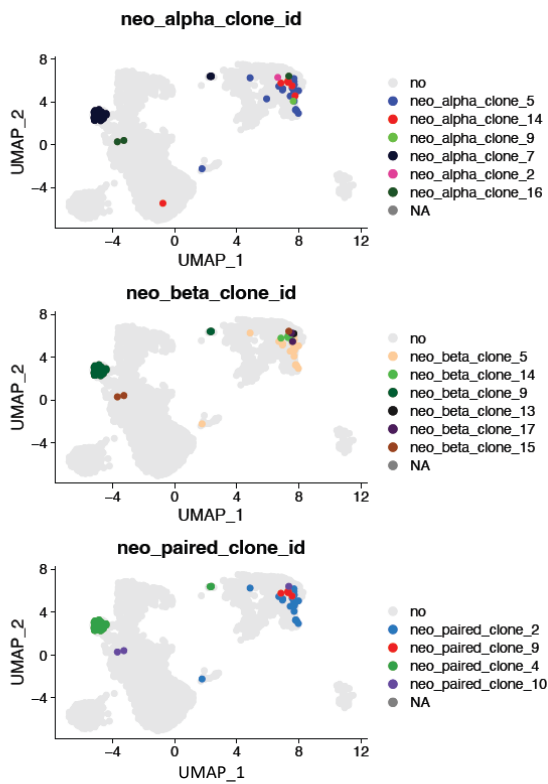**B.**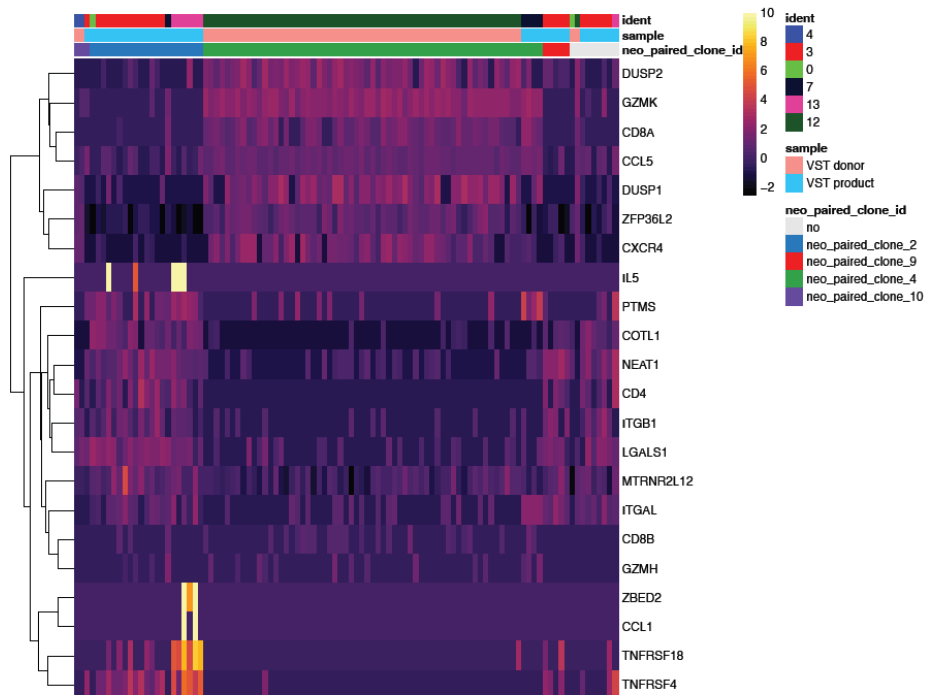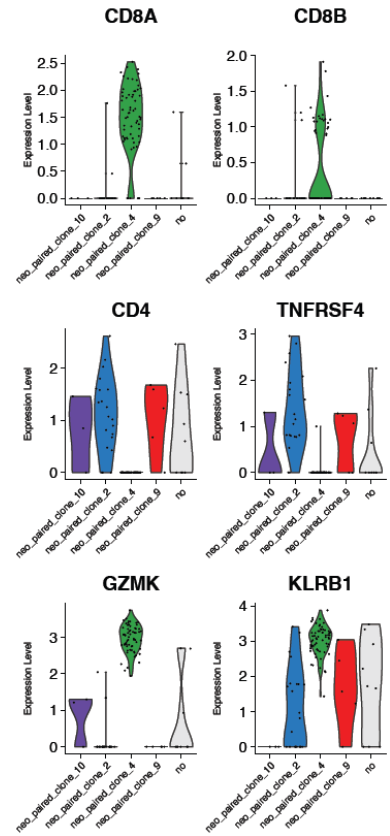

Supplemental Figure 6: Transcriptomic data from neoantigen-specific T cells from the VST donor, product, and recipient. A. Overlap of sorted neoantigen-specific clonotypes in the VST product, donor, and recipient following bulk TCRA (upper) and TCRb (lower) sequencing, and corresponding phenotypes based on principle component analysis. B. Gene expression of sorted neoantigen-specific T cell clones from the VST donor by heat map as well as selected individual genes.

**A.**

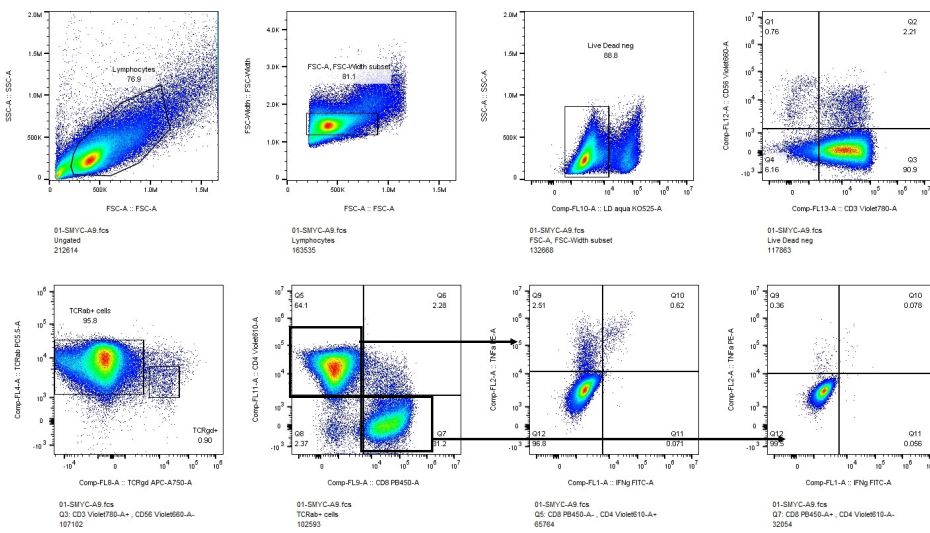

**B.**

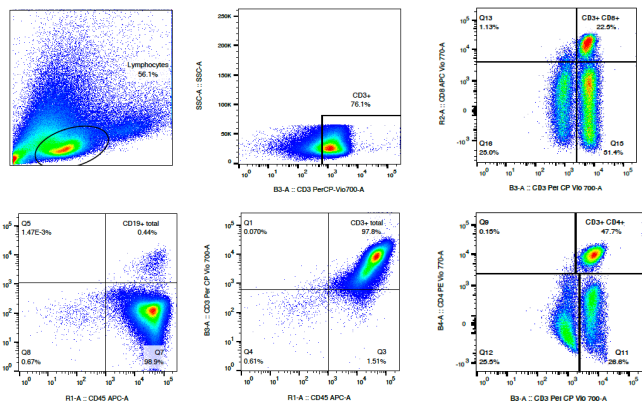

**C.**

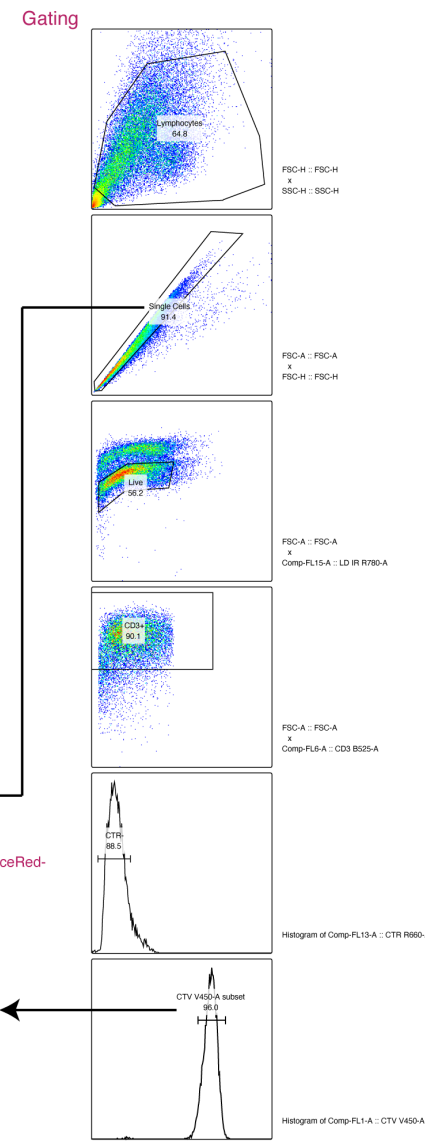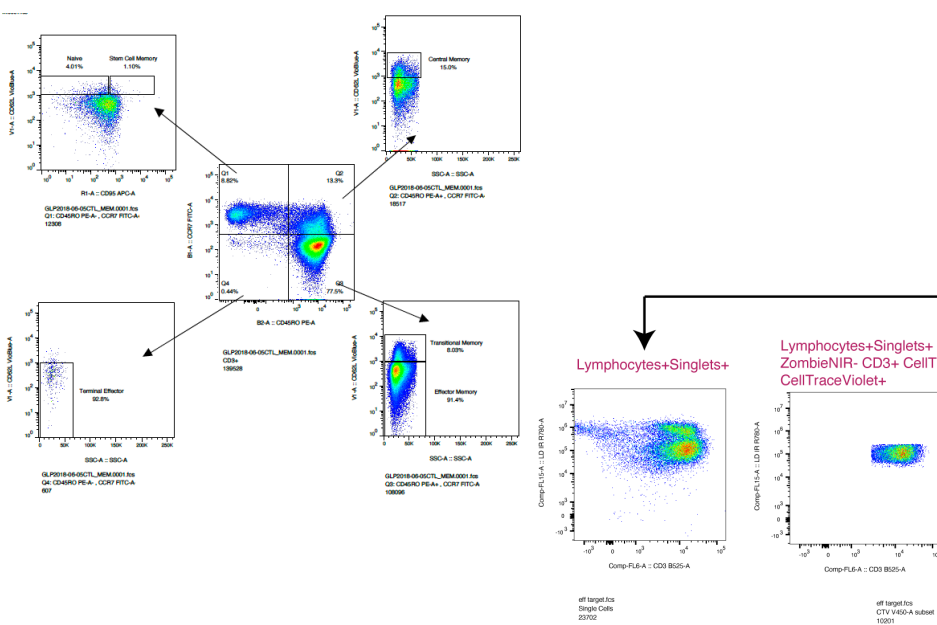

Supplemental Figure 7: Gating strategies for flow cytometry. A. Gating for Intracellular cytokine staining panel (Supplemental Figure 4). B. Gating for surface flow cytometry (Figure 1B, Supplemental Figures 1B and 3A). C. Gating for mixed lymphocyte reactions (Supplemental Figure 2). LD=live/dead, CTR= cell trace red.



Supplemental Table 1: HLA details of the Recipient, BMT donor, VST donor, and mismatched control

|                                   | HLA-A       | HLA-B       | HLA-C       | DRB1        | DQB1        | DPB1        |
|-----------------------------------|-------------|-------------|-------------|-------------|-------------|-------------|
| <b>Recipient</b>                  | 31:01:00    | 35:01:00    | 03:04       | 04:07       | 03:02       | 04:02       |
|                                   | 68:01:00    | xx          | 07:02       | 08:02       | 04:02       | 14:01       |
| <b>BMT donor (father)</b>         | 02:01:01:73 | 35:01:01:02 | 03:04:01:02 | 08:02:01:01 | 03:BJFYF    | 04:02:01:02 |
|                                   | 68:01:51    | 35:17:01    | 04:01:01:01 | 14:06:01    | 04:BJFYF    | 14:01:01:01 |
| <b>P0230D (VST donor)</b>         | 02:11:01:01 | 15:18:01:02 | 07:04:01:01 | 15:01:01:01 | 06:01:01:01 | 04:01:01:01 |
|                                   | 68:01:02:02 | 40:06:01:02 | 15:02:01:01 | 15:02:01:01 | 06:01:01:01 | 04:01:01:41 |
| <b>HLA-mismatched donor (MLR)</b> | 03:01       | 14:02       | 04:01       | 14:54       | 02:02       | 04:01       |
|                                   | 29:03       | 35:01       | 08:02       | 07:01       | 05:03       | 15:01       |

Supplemental Table 2: Candidate Neoantigens based on whole genome sequencing

| Chr | Pos       | Ref                                    | Variant                                  | Gene    | Change                 | NT / Protein Change       | PopFreq Max | VST donor | BMT Donor       | Son1   | Son2   |
|-----|-----------|----------------------------------------|------------------------------------------|---------|------------------------|---------------------------|-------------|-----------|-----------------|--------|--------|
| X   | 2836181   | A                                      | T                                        | ARSD    | nonsynonymous_SNV      | c.T527A:p.M176K           | 5.00E-05    | absent    | het             | het    | het    |
| X   | 2836184   | C                                      | T                                        | ARSD    | nonsynonymous_SNV      | c.G524A:p.G175D           | 0.0001      | absent    | het             | het    | het    |
| X   | 2836211   | A                                      | T                                        | ARSD    | nonsynonymous_SNV      | c.T497A:p.L166Q           | 0.0002      | absent    | het             | het    | het    |
| X   | 2835863   | G                                      | T                                        | ARSD    | nonsynonymous_SNV      | c.C845A:p.A282D           | 0.0003      | absent    | het             | het    | het    |
| X   | 2836238   | G                                      | A                                        | ARSD    | nonsynonymous_SNV      | c.C470T:p.S157F           | 0.0004      | absent    | het             | het    | het    |
| X   | 2836041   | A                                      | T                                        | ARSD    | nonsynonymous_SNV      | c.T667A:p.F223I           | 0.0005      | absent    | het             | het    | het    |
| X   | 2836047   | C                                      | T                                        | ARSD    | nonsynonymous_SNV      | c.G661A:p.G221S           | 0.0006      | absent    | het             | het    | het    |
| 19  | 36632042  | CGGCG<br>GCGGC<br>GGCGG<br>TGGTG<br>GA | C.CGG<br>CGGCG<br>GCGGC<br>GGTGG<br>AGGA | CAPNS1  | nonframeshift_deletion | c.130_150del:p.G50_G56del | 0.0011      | absent    | Two alt alleles | het    | absent |
| 16  | 70208251  | G                                      | A                                        | CLEC18C | nonsynonymous_SNV      | c.G70A:p.A24T             | 0.0073      | absent    | het             | het    | absent |
| 17  | 62892031  | C                                      | T                                        | LRR37A3 | nonsynonymous_SNV      | c.G1345A:p.V449I          | 0.0308      | absent    | het             | absent | het    |
| 17  | 62891989  | G                                      | A                                        | LRR37A3 | nonsynonymous_SNV      | c.C1387T:p.P463S          | 0.0323      | absent    | het             | absent | het    |
| 1   | 146400104 | G                                      | A                                        | NBPF12  | nonsynonymous_SNV      | G580A:p.A194T             | .           | absent    | het             | absent | het    |
| 6   | 30954245  | T                                      | C                                        | MUC21   | nonsynonymous_SNV      | c.T293C:p.V98A            | .           | absent    | het             | het    | het    |
| Y   | 21154426  | G                                      | A                                        | CD24    | nonsynonymous_SNV      | c.C170T:p.A57V            | .           | absent    | het             | absent | het    |
| 17  | 62892031  | C                                      | T                                        | LRR37A3 | nonsynonymous_SNV      | c.G1345A:p.V449I          | 0.0308      | absent    | het             | het    | absent |
| 17  | 62891989  | G                                      | A                                        | LRR37A3 | nonsynonymous_SNV      | c.C1387T:p.P463S          | 0.0323      | absent    | het             | het    | absent |
| 17  | 62892071  | G                                      | C                                        | LRR37A3 | nonsynonymous_SNV      | c.C1305G:p.H435Q          | 0.0536      | absent    | het             | het    | absent |
| 16  | 14960480  | A                                      | G                                        | NOMO1   | nonsynonymous_SNV      | c.A1738G:p.M580V          | 0.0652      | absent    | het             | het    | absent |
| 12  | 44238723  | G                                      | A                                        | TMEM117 | nonsynonymous_SNV      | c.G269A:p.R90H            | 0.0687      | absent    | het             | het    | absent |
| 19  | 5720074   | G                                      | C                                        | LONP1   | nonsynonymous_SNV      | c.C70G:p.L24V             | 0.0968      | absent    | het             | het    | absent |

Supplemental Table 3: Prior use of VST product P0230D

|                                   | HLA-A        | HLA-B                | HLA-C                | HLA-DRB1             | HLA-DQB1                    | Degree of match | Viral specificity                 |
|-----------------------------------|--------------|----------------------|----------------------|----------------------|-----------------------------|-----------------|-----------------------------------|
| <b>Patient HLA</b>                | 23:01, 68:01 | 15:03, 35:01         | 02:10, 04:01         | 03:01, 11:01         | 02:01, 06:02                |                 |                                   |
| <b>cord 1</b>                     | 01:01, 68:01 | 15:01, 35:03         | 03:03, 04:01         | 03:01, 03:01         | 02:01, 02:01                |                 |                                   |
| <b>cord 2 (engrafted)</b>         | 23:01, 68:02 | 15:03, 35:01         | 03:04, 04:01         | 11:01, 11:01         | 03:19, 06:02                |                 |                                   |
| <b>VST products</b>               |              |                      |                      |                      |                             |                 |                                   |
| P0231D (1 <sup>st</sup> infusion) | 02:01, 68:01 | 18:01, 27:05         | <b>02:02</b> , 07:01 | <b>03:01</b> , 09:01 | <b>02:01</b> , 03:03        | 4/10            | CMV: +++A02, +++A68(pp65 and IE1) |
| P0230D (2 <sup>nd</sup> infusion) | 02:11, 68:01 | <b>15:18</b> , 40:06 | 07:04, 15:02         | 15:01, 15:02         | <b>06:01</b> , <b>06:01</b> | 3/10<br>2/10    | CMV: +++A68 (IE1)                 |
| P0108D (3 <sup>rd</sup> infusion) | 68:02, 34:02 | 15:03, 81:01         | 18:xx, 02:xx         | 15:03, 16:02         | 05:xx, 06:02                | (4/10 recip)    | CMV: unknown                      |

## Supplemental Table 4: Proposed suitability requirements for third-party Immune Effector Therapy Donation

|                                                                                                                                                                                                                                                                                                                                                                                                                                                                                                                                                                                                                                                                                                                                                                                                                                                                                                                                                                                                       |
|-------------------------------------------------------------------------------------------------------------------------------------------------------------------------------------------------------------------------------------------------------------------------------------------------------------------------------------------------------------------------------------------------------------------------------------------------------------------------------------------------------------------------------------------------------------------------------------------------------------------------------------------------------------------------------------------------------------------------------------------------------------------------------------------------------------------------------------------------------------------------------------------------------------------------------------------------------------------------------------------------------|
| <p><b>Physical requirements</b></p> <p>Donors must be in good health, with no history of recent illness within the past month prior to planned blood donation.</p> <p>Donors must be ≤ 35 years of age (women) and ≤ 40 years of age (men).</p>                                                                                                                                                                                                                                                                                                                                                                                                                                                                                                                                                                                                                                                                                                                                                       |
| <p><b>History requirements</b></p> <p>Donors shall have no immediate or recent illnesses.</p> <p>Individuals with any infection (acute or chronic) in the prior month would not be suitable.</p> <p>Individuals who have received antibiotic or antiviral therapy in the prior month would not be suitable.</p>                                                                                                                                                                                                                                                                                                                                                                                                                                                                                                                                                                                                                                                                                       |
| <p>Donors shall have minimal risk of cell-mediated allosensitization.</p> <p>Donors who have received previous blood transfusions or blood products would not be suitable.</p> <p>Women who have had 2 or more pregnancies would not be suitable.</p>                                                                                                                                                                                                                                                                                                                                                                                                                                                                                                                                                                                                                                                                                                                                                 |
| <p>Donors shall not have had recent exposure to potentially transmissible attenuated viruses.</p> <p>Those who received any live vaccine in the previous 3 months would not be suitable</p> <p>Donors who have had close contact with any individual who received the smallpox vaccine in the previous 3 months would not be suitable.</p>                                                                                                                                                                                                                                                                                                                                                                                                                                                                                                                                                                                                                                                            |
| <p>Donors shall not have a history of autoimmune or other immune-mediated disease</p> <p>Suitable donors must not have history of any of the following conditions:</p> <ul style="list-style-type: none"> <li>Immune thrombocytopenic purpura</li> <li>Autoimmune hemolytic anemia</li> <li>Hashimoto's thyroiditis</li> <li>Grave's disease</li> <li>Inflammatory bowel disease (Crohn's disease or Ulcerative colitis)</li> <li>Rheumatoid arthritis</li> <li>Scleroderma</li> <li>Immune-mediated glomerulonephritis or related kidney disease</li> <li>Systemic Lupus Erythematosus</li> <li>Psoriatic arthritis</li> <li>Celiac disease</li> <li>Type-I diabetes mellitus</li> </ul> <p>Other immune-mediated diseases which in the opinion of the evaluating physicians, would render the donor unsuitable for IEC donation.</p> <p>History of psoriasis or vitiligo may not render a donor unsuitable if the disease is quiescent and is not being treated with immunosuppressive therapy.</p> |
| <p>Donors shall not have a history of moderate to severe atopic conditions</p> <p>History of any of the following conditions would make a donor unsuitable:</p> <p>Atopic dermatitis: moderate to severe disease in the prior 5 years</p> <p>Asthma: moderate to severe persistent asthma (based on NAEPP guidelines) that has been diagnosed or treated in the prior 10 years.</p>                                                                                                                                                                                                                                                                                                                                                                                                                                                                                                                                                                                                                   |
| <p>Donors must not have a history of any of the following conditions or procedures:</p> <ul style="list-style-type: none"> <li>Hematologic or solid tumors</li> <li>Solid organ transplant</li> <li>Hematopoietic stem cell transplantation</li> <li>Open heart surgery</li> <li>Elective or emergency surgical procedures in the past 6 months (excluding skin biopsies).</li> </ul> <p>Have, or be a symptomatic carrier of, any form of primary immunodeficiency disorder.</p> <p>Family members of any patient with a known primary immunodeficiency disorder must undergo immunologic workup prior to potential donation for IEC therapy.</p>                                                                                                                                                                                                                                                                                                                                                    |
| <p>Donors may not have received any of the following medications or therapies</p> <ul style="list-style-type: none"> <li>Monoclonal antibody therapies (at any time in the past).</li> <li>Oral or IV corticosteroid therapy within the past 3 months</li> <li>High potency topical steroids (class I-II) within the past 3 months.</li> <li>Other immunosuppressive therapy, including cyclosporin, sirolimus, tacrolimus, ruxolitinib, tofacitinib, methotrexate, 6MP, azathioprine, dapsone, or other related therapies (at any time in the past)</li> </ul>                                                                                                                                                                                                                                                                                                                                                                                                                                       |

Supplemental Table 5: Supplemental Recipient Eligibility requirements for VST infusion

| Recipient Supplemental Eligibility Requirements                                                                                                                                                                                                     |
|-----------------------------------------------------------------------------------------------------------------------------------------------------------------------------------------------------------------------------------------------------|
| Patients who have undergone HSCT must have stable chimerism (defined as >95% donor chimerism [CD33 or whole blood chimerism], OR >90% donor chimerism [CD33 or whole blood] with <5% change between subsequent tests separated by at least 1 week). |
| Patients with severe combined immunodeficiency who are less than 100 days post $\alpha/\beta$ TCR depleted HSCT would be ineligible for VST infusion.                                                                                               |

Supplemental Table 6: Surface stain antibody panel

| Tube               | Antibodies |            |           |       |            |            |       |         |           |           |             |              |
|--------------------|------------|------------|-----------|-------|------------|------------|-------|---------|-----------|-----------|-------------|--------------|
| Channel            | Violet 660 | APC-A750   | K0525     | FITC  | PE         | PC7        | APC   | PB450   | Violet610 | PerCP PC5 | ECD mCherry | APC-A700     |
| Color              | BV650      | APC Vio770 | Vio-Green | FITC  | PE         | PEVio-700  | APC   | VioBlue | LD yellow | PerCP Vio | PEVio-615   | Alexa-700    |
| Isotype            | CD56       | CD3        | CD45      | REA   | REA (2ul)  | Mouse IgG1 | REA   | IgG1k   | LD yellow | REA       | REA         | mouse IgG1,K |
| Per tube: 25ul     | (5ul)      | (2ul)      | (2ul)     | (2ul) |            | (2ul)      | (2ul) | (2ul)   | (2ul/ml)  | (2ul)     | (2ul)       | (2ul)        |
| NK Panel           | CD56       | CD3        | CD45      | CD52  | HLA        | NKG2D      | CD57  | CD20    | LD yellow | CD8       | iNKT        | CD4          |
| Per tube: 31ul+HLA | (5ul)      | (2ul)      | (2ul)     | (2ul) | - (varies) | (10ul)     | (2ul) | (2ul)   | (2ul/ml)  | (2ul)     | (2ul)       | (2ul)        |

Supplemental Table 7: Intracellular staining antibody panel

| Tube    | Antibodies |           |       |       |       |      |      |           |      |           |
|---------|------------|-----------|-------|-------|-------|------|------|-----------|------|-----------|
| Channel | PB450      | KO525     | BV610 | BV660 | BV780 | FITC | PE   | ECD       | APC  | APC-A700  |
| Color   | BV421      | Ghost 510 | BV605 | BV750 | BV785 |      |      | PE Dazzle | APC  | Alexa 700 |
| Ab      | CD8        | LD        | CD4   | CD56  | CD3   | HLA  | TNFa | CD45RO    | IFNg | CCR7      |

Supplemental Table 8: Product release surface antibody panel

| PanLeuko           | TCR                | DC                 |
|--------------------|--------------------|--------------------|
| CD14 VioBlue       |                    | CD14 VioBlue       |
| CD19 FITC          | TCRab FITC         | HLA DR FITC        |
| CD16/CD56 PE       | TCRgd PE           | CD83 PE            |
| CD3 Per CP Vio 700 | CD3 Per CP Vio 700 | CD3 Per CP Vio 700 |
| CD4 PE Vio 770     | CD4 PE Vio 770     |                    |
| CD45 APC           | CD45 APC           | CD45 APC           |
| CD8 APV Vio770     | CD8 APV Vio770     |                    |



Supplemental Table 9: Antibodies Details: Intracellular flow panel

| Antibody                                                           | Manufacturer | Catalog # | Clone  | Format           | Vol/<br>test<br>(1E6<br>cells) | Mfg references                                                                                                                                                                                                                                                                                                                                                                |
|--------------------------------------------------------------------|--------------|-----------|--------|------------------|--------------------------------|-------------------------------------------------------------------------------------------------------------------------------------------------------------------------------------------------------------------------------------------------------------------------------------------------------------------------------------------------------------------------------|
| Brilliant Violet 421™ anti-human CD8a Antibody                     | BioLegend    | 301036    | RPA-T8 | BV421            | 5ul                            | <a href="https://www.biolegend.com/en-us/products/brilliant-violet-421-anti-human-cd8a-antibody-7152">https://www.biolegend.com/en-us/products/brilliant-violet-421-anti-human-cd8a-antibody-7152</a>                                                                                                                                                                         |
| LIVE/DEAD™ Fixable Aqua Dead Cell Stain Kit, for 405 nm excitation | Invitrogen   | L34966    | N/A    | Aqua             | 1ul/ml                         | <a href="https://www.thermofisher.com/document-connect/document-connect.html?url=https://assets.thermofisher.com/TFS-Assets%2FMSG%2Fmanuals%2Flive_dead_fixable_dead_cell_stains_man.pdf">https://www.thermofisher.com/document-connect/document-connect.html?url=https://assets.thermofisher.com/TFS-Assets%2FMSG%2Fmanuals%2Flive_dead_fixable_dead_cell_stains_man.pdf</a> |
| Brilliant Violet 605™ anti-human CD4 Antibody                      | BioLegend    | 317438    | OKT4   | BV605            | 5ul                            | <a href="https://www.biolegend.com/en-us/products/brilliant-violet-605-anti-human-cd4-antibody-7820">https://www.biolegend.com/en-us/products/brilliant-violet-605-anti-human-cd4-antibody-7820</a>                                                                                                                                                                           |
| Brilliant Violet 650™ anti-human CD56 (NCAM) Antibody              | BioLegend    | 318344    | HCD56  | BV650            | 5ul                            | <a href="https://www.biolegend.com/en-us/products/brilliant-violet-650-anti-human-cd56-ncam-antibody-8780">https://www.biolegend.com/en-us/products/brilliant-violet-650-anti-human-cd56-ncam-antibody-8780</a>                                                                                                                                                               |
| Brilliant Violet 785™ anti-human CD3 Antibody                      | BioLegend    | 317330    | OKT3   | BV785            | 5ul                            | <a href="https://www.biolegend.com/en-us/products/brilliant-violet-785-anti-human-cd3-antibody-7977">https://www.biolegend.com/en-us/products/brilliant-violet-785-anti-human-cd3-antibody-7977</a>                                                                                                                                                                           |
| PE anti-human TNF-α Antibody                                       | BioLegend    | 502909    | MAB11  | PE               | 5ul                            | <a href="https://www.biolegend.com/en-us/products/pe-anti-human-tnf-alpha-antibody-1346">https://www.biolegend.com/en-us/products/pe-anti-human-tnf-alpha-antibody-1346</a>                                                                                                                                                                                                   |
| PE/Dazzle™ 594 anti-human CD45RO Antibody                          | BioLegend    | 304248    | UCHL1  | PE/Dazzle™ 594   | 5ul                            | <a href="https://www.biolegend.com/en-us/products/pe-dazzle-594-anti-human-cd45ro-antibody-12489">https://www.biolegend.com/en-us/products/pe-dazzle-594-anti-human-cd45ro-antibody-12489</a>                                                                                                                                                                                 |
| PerCP/Cyanine5.5 anti-human TCR α/β Antibody                       | BioLegend    | 306724    | IP26   | PerCP/Cyanine5.5 | 5ul                            | <a href="https://www.biolegend.com/en-us/products/percp-cyanine5-5-anti-human-tcr-alpha-beta-antibody-9232">https://www.biolegend.com/en-us/products/percp-cyanine5-5-anti-human-tcr-alpha-beta-antibody-9232</a>                                                                                                                                                             |
| PE/Cyanine7 anti-human CD107a (LAMP-1) Antibody                    | BioLegend    | 328618    | H4A3   | PE/Cyanine7      | 5ul                            | <a href="https://www.biolegend.com/en-us/products/pe-cyanine7-anti-human-cd107a-lamp-1-antibody-7707">https://www.biolegend.com/en-us/products/pe-cyanine7-anti-human-cd107a-lamp-1-antibody-7707</a>                                                                                                                                                                         |
| APC anti-human IFN-γ Antibody                                      | BioLegend    | 502512    | 4S.B3  | APC              | 5ul                            | <a href="https://www.biolegend.com/en-us/products/apc-anti-human-ifn-gamma-antibody-1012">https://www.biolegend.com/en-us/products/apc-anti-human-ifn-gamma-antibody-1012</a>                                                                                                                                                                                                 |
| Alexa Fluor® 700 anti-human CD197 (CCR7) Antibody                  | BioLegend    | 353244    | G043H7 | AF700            | 5ul                            | <a href="https://www.biolegend.com/en-us/products/alexa-fluor-700-anti-human-cd197-ccr7-antibody-13407">https://www.biolegend.com/en-us/products/alexa-fluor-700-anti-human-cd197-ccr7-antibody-13407</a>                                                                                                                                                                     |
| APC/Fire™ 750 anti-human TCR γ/δ Antibody                          | BioLegend    | 331228    | B1     | APC/Fire™ 750    | 5ul                            | <a href="https://www.biolegend.com/en-us/products/apc-fire-750-anti-human-tcr-gamma-delta-antibody-14101">https://www.biolegend.com/en-us/products/apc-fire-750-anti-human-tcr-gamma-delta-antibody-14101</a>                                                                                                                                                                 |

Supplemental Table 10: HLA Antibody details

| HLA Specificity | Manufacturer | Splits and Associated Ab                                                                                                                                                       | Catalog #                 | Clone          | Channels                                       | Volume used/cells  | Mfg references                                                                                                                                                                                                                                                                            |
|-----------------|--------------|--------------------------------------------------------------------------------------------------------------------------------------------------------------------------------|---------------------------|----------------|------------------------------------------------|--------------------|-------------------------------------------------------------------------------------------------------------------------------------------------------------------------------------------------------------------------------------------------------------------------------------------|
| A2              | Milteyni     | A203#, A210#                                                                                                                                                                   | 130-118-969               | REA517         | FITC                                           | 2 ul / 200k cells  | <a href="https://www.miltenyibiotec.com/US-en/products/hla-a2-antibody-anti-human-rea517.html#conjugate=fitc:size=100-tests-in-200-ul">https://www.miltenyibiotec.com/US-en/products/hla-a2-antibody-anti-human-rea517.html#conjugate=fitc:size=100-tests-in-200-ul</a>                   |
| A3              | Milteyni     | N/A                                                                                                                                                                            | 130-115-739               | REA950         | FITC                                           | 2 ul / 200k cells  | <a href="https://www.miltenyibiotec.com/US-en/products/hla-a3-antibody-anti-human-rea950.html#conjugate=fitc:size=100-tests-in-200-ul">https://www.miltenyibiotec.com/US-en/products/hla-a3-antibody-anti-human-rea950.html#conjugate=fitc:size=100-tests-in-200-ul</a>                   |
| A28:A2          | Milteyni     | A68, A69                                                                                                                                                                       | 130-099-601               | REA142         | FITC                                           | 10 ul / 200k cells | <a href="https://www.miltenyibiotec.com/US-en/products/hla-a2-a28-antibody-anti-human-rea142.html#conjugate=fitc:size=100-tests-in-200-ul">https://www.miltenyibiotec.com/US-en/products/hla-a2-a28-antibody-anti-human-rea142.html#conjugate=fitc:size=100-tests-in-200-ul</a>           |
| A9              | Milteyni     | A23, A24, A2403#                                                                                                                                                               | 130-099-524               | REA127         | FITC                                           | 2 ul / 200k cells  | <a href="https://www.miltenyibiotec.com/US-en/products/hla-a9-antibody-anti-human-rea127.html#conjugate=fitc:size=100-tests-in-1-ml">https://www.miltenyibiotec.com/US-en/products/hla-a9-antibody-anti-human-rea127.html#conjugate=fitc:size=100-tests-in-1-ml</a>                       |
| A30:A31         | One Lambda   | N/A                                                                                                                                                                            | Streptavidin FITC: 405201 | Not applicable | Biotin (+ Streptavidin FITC and PE conjugates) | 2ul/200k cells     | N/A                                                                                                                                                                                                                                                                                       |
| B7              | Thermo(FITC) | B703#                                                                                                                                                                          | MA1-82180                 | BB7.1          | FITC                                           | 10 ul / 200k cells | <a href="https://www.thermofisher.com/antibody/product/HLA-B7-Antibody-clone-BB7-1-Monoclonal/MA1-82180">https://www.thermofisher.com/antibody/product/HLA-B7-Antibody-clone-BB7-1-Monoclonal/MA1-82180</a>                                                                               |
| B12             | Milteyni     | B44,B45                                                                                                                                                                        | 130-099-862               | REA138         | FITC                                           | 30 tests in 300ul  | <a href="https://www.miltenyibiotec.com/US-en/products/hla-b12-antibody-anti-human-rea138.html#conjugate=fitc:size=30-tests-in-300-ul">https://www.miltenyibiotec.com/US-en/products/hla-b12-antibody-anti-human-rea138.html#conjugate=fitc:size=30-tests-in-300-ul</a>                   |
| Bw4             | Milteyni     | B5, B5102, B5103, B13, B17, B27, B37, B38(16), B44(12), B47, B49(21), B51(5), B52(5), B53, B57(17), B58(17), B59, B63(15), B77(15) A9, A23(9), A24(9), A2403, A25(10), A32(19) | 130-103-846               | REA274         | FITC                                           | 10ul/200k cells    | <a href="https://www.miltenyibiotec.com/US-en/products/hla-class-i-bw4-antibody-anti-human-rea274.html#conjugate=pe:size=30-tests-in-60-ul">https://www.miltenyibiotec.com/US-en/products/hla-class-i-bw4-antibody-anti-human-rea274.html#conjugate=pe:size=30-tests-in-60-ul</a>         |
| Bw6             | Milteyni     | B7, B703, B8, B14, B18, B22, B2708, B35, B39(16), B3901, B3902, B40, B4005, B41, B42, B45(12), B46, B48, B50(21),                                                              | 130-123-264               | REA143         | FITC                                           | 2 ul / 200k cells  | <a href="https://www.miltenyibiotec.com/US-en/products/hla-class-i-bw6-antibody-anti-human-rea143.html#conjugate=fitc:size=100-tests-in-200-ul">https://www.miltenyibiotec.com/US-en/products/hla-class-i-bw6-antibody-anti-human-rea143.html#conjugate=fitc:size=100-tests-in-200-ul</a> |

|                                    |                               |                                                                                                                                                                                       |                      |                  |              |                                   |                                                                                                                                                                                                                                                                                                       |
|------------------------------------|-------------------------------|---------------------------------------------------------------------------------------------------------------------------------------------------------------------------------------|----------------------|------------------|--------------|-----------------------------------|-------------------------------------------------------------------------------------------------------------------------------------------------------------------------------------------------------------------------------------------------------------------------------------------------------|
|                                    |                               | B54(22),<br>B55(22),<br>B56(22),<br>B60(40),<br>B61(40),<br>B62(15),<br>B64(14),<br>B65(14),<br>B67, B70,<br>B71(70),<br>B72(70),<br>B73,<br>B75(15),<br>B76(15),<br>B78, B81,<br>B82 |                      |                  |              |                                   |                                                                                                                                                                                                                                                                                                       |
| B7, B27                            | Miltenyi                      | B27 splits<br>to B2708#                                                                                                                                                               | 130-120-<br>234      | REA176           | FITC         | 2 ul / 200k<br>cells              | <a href="https://www.miltenyibiotec.com/US-en/products/hla-b7-b27-antibody-anti-human-rea176.html#conjugate=vio-bright-fitc:size=100-tests-in-200-ul">https://www.miltenyibiotec.com/US-en/products/hla-b7-b27-antibody-anti-human-rea176.html#conjugate=vio-bright-fitc:size=100-tests-in-200-ul</a> |
|                                    |                               |                                                                                                                                                                                       | 130-120-<br>308      | REA176           | FITC         | 2 ul / 1E6 cells                  | <a href="https://www.miltenyibiotec.com/US-en/products/hla-b7-b27-antibody-anti-human-rea176.html#conjugate=vio-bright-fitc:size=30-tests-in-60-ul">https://www.miltenyibiotec.com/US-en/products/hla-b7-b27-antibody-anti-human-rea176.html#conjugate=vio-bright-fitc:size=30-tests-in-60-ul</a>     |
| HLA_A33,<br>B8                     | Life Span<br>Biosci           | N/A                                                                                                                                                                                   | LS-C24464-<br>100    | Not<br>appliable | unconjugated | Use as<br>manufacturer's<br>guide | <a href="https://www.lsbio.com/antibodies/hla-a33b8-antibody-ls-c24464/25046">https://www.lsbio.com/antibodies/hla-a33b8-antibody-ls-c24464/25046</a>                                                                                                                                                 |
| Anti-HLA-<br>A24<br>(Human)<br>mAb | MBL<br>international<br>corp. | A2403#                                                                                                                                                                                | K0208-4 &<br>K0208-5 | 17A10            | FITC         | Use as<br>manufacturer's<br>guide | <a href="https://www.mblbio.com/bio/g/dtl/A/?pcd=K0208-5">https://www.mblbio.com/bio/g/dtl/A/?pcd=K0208-5</a>                                                                                                                                                                                         |

Supplemental Table 11: Product release surface staining panel

| Antibody/fluorophore | Vendor   | Catalog Number | Clone  | Volume Used/2E5 cells | Mfg references                                                                                                                                                                                                                                                                                                                          |
|----------------------|----------|----------------|--------|-----------------------|-----------------------------------------------------------------------------------------------------------------------------------------------------------------------------------------------------------------------------------------------------------------------------------------------------------------------------------------|
| CD45 APC             | Miltenyi | 130-110-633    | REA747 | 1ul                   | <a href="https://www.miltenyibiotec.com/US-en/products/cd45-antibody-anti-human-reafinity-rea747.html#conjugate=apc:size=100-tests-in-200-ul">https://www.miltenyibiotec.com/US-en/products/cd45-antibody-anti-human-reafinity-rea747.html#conjugate=apc:size=100-tests-in-200-ul</a>                                                   |
| CD3 PerCP Vio 700    | Miltenyi | 130-113-141    | REA613 | 1ul                   | <a href="https://www.miltenyibiotec.com/US-en/products/cd3-antibody-anti-human-reafinity-rea613.html#conjugate=percp-vio-700:size=100-tests-in-200-ul">https://www.miltenyibiotec.com/US-en/products/cd3-antibody-anti-human-reafinity-rea613.html#conjugate=percp-vio-700:size=100-tests-in-200-ul</a>                                 |
| CD19 FITC            | Miltenyi | 130-113-645    | REA675 | 1ul                   | <a href="https://www.miltenyibiotec.com/US-en/products/cd19-antibody-anti-human-reafinity-rea675.html#conjugate=fitc:size=100-tests-in-200-ul">https://www.miltenyibiotec.com/US-en/products/cd19-antibody-anti-human-reafinity-rea675.html#conjugate=fitc:size=100-tests-in-200-ul</a>                                                 |
| CD14 VioBlue         | Miltenyi | 130-110-524    | REA599 | 2ul                   | <a href="https://www.miltenyibiotec.com/US-en/products/cd14-antibody-anti-human-reafinity-rea599.html#conjugate=vioblue:size=100-tests-in-200-ul">https://www.miltenyibiotec.com/US-en/products/cd14-antibody-anti-human-reafinity-rea599.html#conjugate=vioblue:size=100-tests-in-200-ul</a>                                           |
| CD4 PE Vio770        | Miltenyi | 130-113-227    | REA623 | 1ul                   | <a href="https://www.miltenyibiotec.com/US-en/products/cd4-antibody-anti-human-reafinity-rea623.html#conjugate=pe-vio-770:size=100-tests-in-200-ul">https://www.miltenyibiotec.com/US-en/products/cd4-antibody-anti-human-reafinity-rea623.html#conjugate=pe-vio-770:size=100-tests-in-200-ul</a>                                       |
| CD8 APC Vio770       | Miltenyi | 130-110-681    | REA734 | 1ul                   | <a href="https://www.miltenyibiotec.com/US-en/products/cd8-antibody-anti-human-reafinity-rea734.html#conjugate=apc-vio-770:size=100-tests-in-200-ul">https://www.miltenyibiotec.com/US-en/products/cd8-antibody-anti-human-reafinity-rea734.html#conjugate=apc-vio-770:size=100-tests-in-200-ul</a>                                     |
| CD16 PE              | Miltenyi | 130-113-393    | REA423 | 1ul                   | <a href="https://www.miltenyibiotec.com/US-en/products/cd16-antibody-anti-human-reafinity-rea423.html#conjugate=pe:size=100-tests-in-200-ul">https://www.miltenyibiotec.com/US-en/products/cd16-antibody-anti-human-reafinity-rea423.html#conjugate=pe:size=100-tests-in-200-ul</a>                                                     |
| CD 56 PE             | Miltenyi | 130-113-312    | REA196 | 1ul                   | <a href="https://www.miltenyibiotec.com/US-en/products/cd56-antibody-anti-human-reafinity-rea196.html#conjugate=pe:size=100-tests-in-200-ul">https://www.miltenyibiotec.com/US-en/products/cd56-antibody-anti-human-reafinity-rea196.html#conjugate=pe:size=100-tests-in-200-ul</a>                                                     |
| CD83 PE              | Miltenyi | 130-110-503    | REA714 | 1ul                   | <a href="https://www.miltenyibiotec.com/US-en/products/cd83-antibody-anti-human-reafinity-rea714.html#conjugate=pe:size=100-tests-in-200-ul">https://www.miltenyibiotec.com/US-en/products/cd83-antibody-anti-human-reafinity-rea714.html#conjugate=pe:size=100-tests-in-200-ul</a>                                                     |
| TCRab FITC           | Miltenyi | 130-113-538    | RES652 | 1ul                   | <a href="https://www.miltenyibiotec.com/US-en/products/tcra-b-antibody-anti-human-reafinity-rea652.html#conjugate=fitc:size=100-tests-in-200-ul">https://www.miltenyibiotec.com/US-en/products/tcra-b-antibody-anti-human-reafinity-rea652.html#conjugate=fitc:size=100-tests-in-200-ul</a>                                             |
| TCRgd PE             | Miltenyi | 130-113-512    | REA591 | 1ul                   | <a href="https://www.miltenyibiotec.com/US-en/products/tcrg-d-antibody-anti-human-reafinity-rea591.html#conjugate=pe:size=100-tests-in-200-ul">https://www.miltenyibiotec.com/US-en/products/tcrg-d-antibody-anti-human-reafinity-rea591.html#conjugate=pe:size=100-tests-in-200-ul</a>                                                 |
| CD45RO PE            | Miltenyi | 130-113-559    | REA611 | 2ul                   | <a href="https://www.miltenyibiotec.com/US-en/products/tcrg-d-antibody-anti-human-reafinity-rea591.html#conjugate=pe:size=100-tests-in-200-ul">https://www.miltenyibiotec.com/US-en/products/tcrg-d-antibody-anti-human-reafinity-rea591.html#conjugate=pe:size=100-tests-in-200-ul</a>                                                 |
| CCR7 FITC            | Miltenyi | 130-120-468    | REA546 | 2ul                   | <a href="https://www.miltenyibiotec.com/US-en/products/cd197-ccr7-antibody-anti-human-reafinity-rea546.html#conjugate=fitc:size=100-tests-in-200-ul">https://www.miltenyibiotec.com/US-en/products/cd197-ccr7-antibody-anti-human-reafinity-rea546.html#conjugate=fitc:size=100-tests-in-200-ul</a>                                     |
| CD95 APC             | BD Bio   | 558814         | DX2    | 2ul                   | <a href="https://www.bdbiosciences.com/en-us/products/reagents/flow-cytometry-reagents/research-reagents/single-color-antibodies-ruo/apc-mouse-anti-human-cd95.558814">https://www.bdbiosciences.com/en-us/products/reagents/flow-cytometry-reagents/research-reagents/single-color-antibodies-ruo/apc-mouse-anti-human-cd95.558814</a> |
| CD62 VioBlue         | Miltenyi | 130-113-622    | 145/15 | 2ul                   | <a href="https://www.miltenyibiotec.com/US-en/products/cd62l-antibody-anti-human-145-15.html#conjugate=vioblue:size=100-tests-in-200-ul">https://www.miltenyibiotec.com/US-en/products/cd62l-antibody-anti-human-145-15.html#conjugate=vioblue:size=100-tests-in-200-ul</a>                                                             |
| HLA DR FITC          | Miltenyi | 30-111-788     | REA805 | 1ul                   | <a href="https://www.miltenyibiotec.com/US-en/products/hla-dr-antibody-anti-human-reafinity-rea805.html#conjugate=vio-bright-r720:size=100-tests-in-200-ul">https://www.miltenyibiotec.com/US-en/products/hla-dr-antibody-anti-human-reafinity-rea805.html#conjugate=vio-bright-r720:size=100-tests-in-200-ul</a>                       |
| FcR Blocking Reagent | Miltenyi | 130-059-901    | N/A    | 10ul                  | <a href="https://www.miltenyibiotec.com/US-en/products/fcr-blocking-reagent-human.html#130-059-901">https://www.miltenyibiotec.com/US-en/products/fcr-blocking-reagent-human.html#130-059-901</a>                                                                                                                                       |

Supplemental Table 12: Pentamer details

| Product description                                          | Manufacturer | Cat#      | Vol/test<br>(1E6<br>cells) | Mfr reference                                                                                                                 |
|--------------------------------------------------------------|--------------|-----------|----------------------------|-------------------------------------------------------------------------------------------------------------------------------|
| F395-0A-D - 395 - A*02:01 - YIGEVLVSV - Pentamer - Unlabeled | Proimmune    | F395-0A-D | 2ul                        | <a href="https://www.proimmune.com/list-of-catalog-pentamers/">https://www.proimmune.com/list-of-catalog-pentamers/</a>       |
| F473-0A-D - 473 - A*02:01 - VLHDDLLEA - Pentamer - Unlabeled | Proimmune    | F473-0A-D | 2ul                        | <a href="https://www.proimmune.com/list-of-catalog-pentamers/">https://www.proimmune.com/list-of-catalog-pentamers/</a>       |
| F581-0A-D - 581 - A*02:01 - RTLDKVLEV - Pentamer - Unlabeled | Proimmune    | F581-0A-D | 2ul                        | <a href="https://www.proimmune.com/list-of-catalog-pentamers/">https://www.proimmune.com/list-of-catalog-pentamers/</a>       |
| F175-0A-D - 175 - A*02:01 - FIDSYICQV - Pentamer - Unlabeled | Proimmune    | F175-0A-D | 2ul                        | <a href="https://www.proimmune.com/list-of-catalog-pentamers/">https://www.proimmune.com/list-of-catalog-pentamers/</a>       |
| K4B-D - Fluorotag - 150 test APC                             | Proimmune    | K4B-D     | 8ul                        | <a href="https://www.proimmune.com/ecommerce/pdf_files/PR06U.pdf">https://www.proimmune.com/ecommerce/pdf_files/PR06U.pdf</a> |

Supplemental Table 13: Mixed Lymphocyte Reaction Celltrace details

| Item                                                          | Cat#          | Mfr reference                                                                                                                     |
|---------------------------------------------------------------|---------------|-----------------------------------------------------------------------------------------------------------------------------------|
| CellTrace™ Far Red Cell Proliferation Kit, for flow cytometry | <b>C34564</b> | <a href="https://www.thermofisher.com/order/catalog/product/C34564">https://www.thermofisher.com/order/catalog/product/C34564</a> |
| CellTrace™ Violet Cell Proliferation Kit, for flow cytometry  | <b>C34557</b> | <a href="https://www.thermofisher.com/order/catalog/product/C34557">https://www.thermofisher.com/order/catalog/product/C34557</a> |
| CellTrace™ Far Red Cell Proliferation Kit, for flow cytometry | <b>C34564</b> | <a href="https://www.thermofisher.com/order/catalog/product/C34564">https://www.thermofisher.com/order/catalog/product/C34564</a> |

User Guide : [https://www.thermofisher.com/document-connect/document-connect.html?url=https://assets.thermofisher.com/TFS-Assets%2FSLG%2Fmanuals%2FMAN0002595\\_CellTrace\\_Cell\\_Proliferation\\_Kits\\_UG.pdf](https://www.thermofisher.com/document-connect/document-connect.html?url=https://assets.thermofisher.com/TFS-Assets%2FSLG%2Fmanuals%2FMAN0002595_CellTrace_Cell_Proliferation_Kits_UG.pdf)
